# Supplementary material for: Comparative Effects of Basic Fibroblast Growth Factor Delivery or Voluntary Exercise on Muscle Regeneration after Volumetric Muscle Loss
Source: MDPI journal article supplement (doi:10.3390/bioengineering9010037), 2022-01-14
Supplement: s1 [file s1]

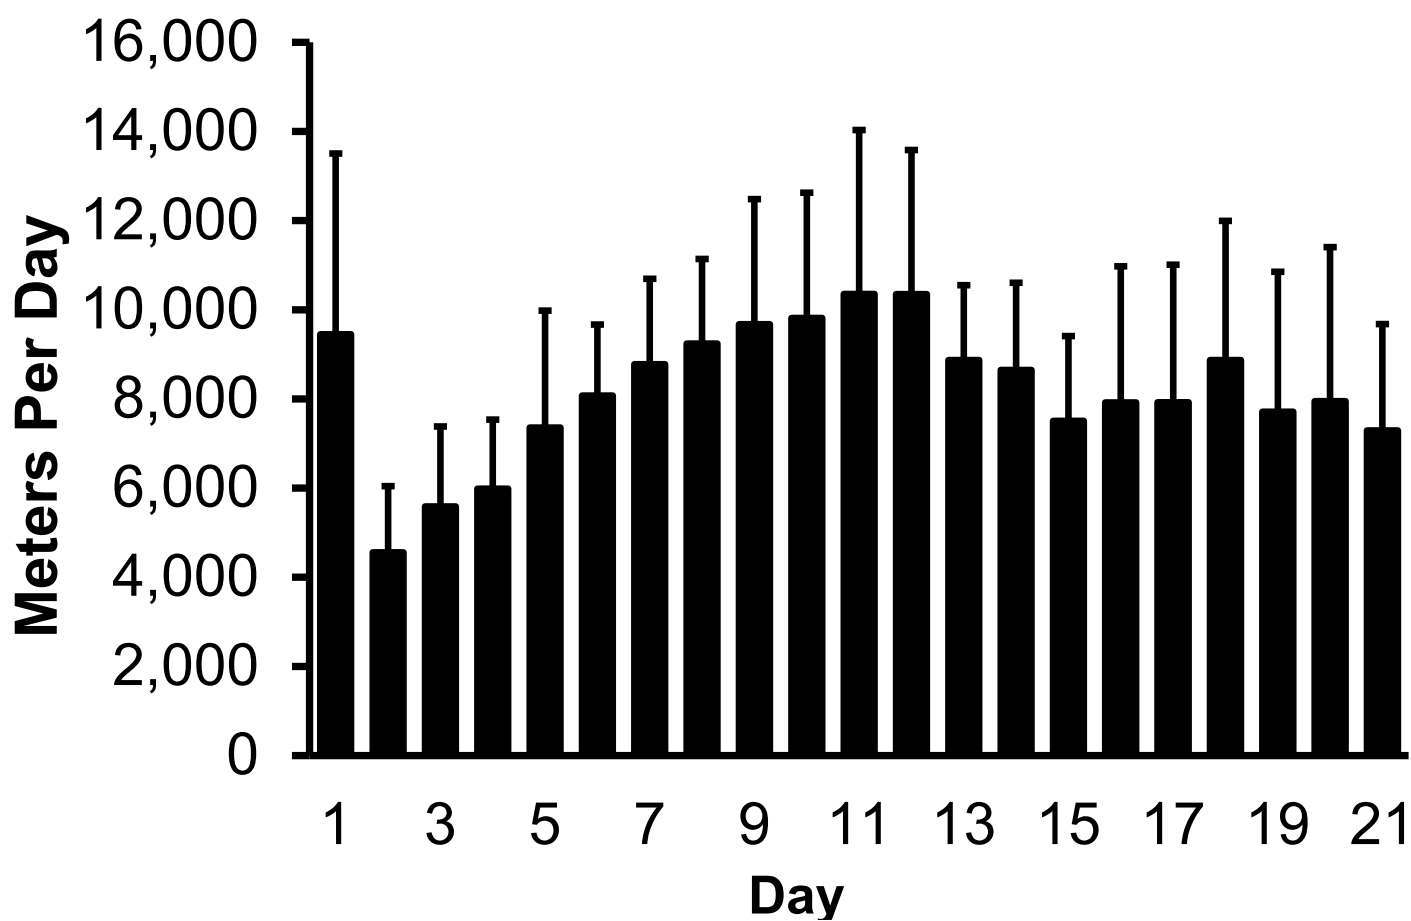

**Figure S1.** Voluntary caged wheel running distance in mice starting on day 0 after induction of VML. Data is shown as mean  $\pm$  SD (n=6).

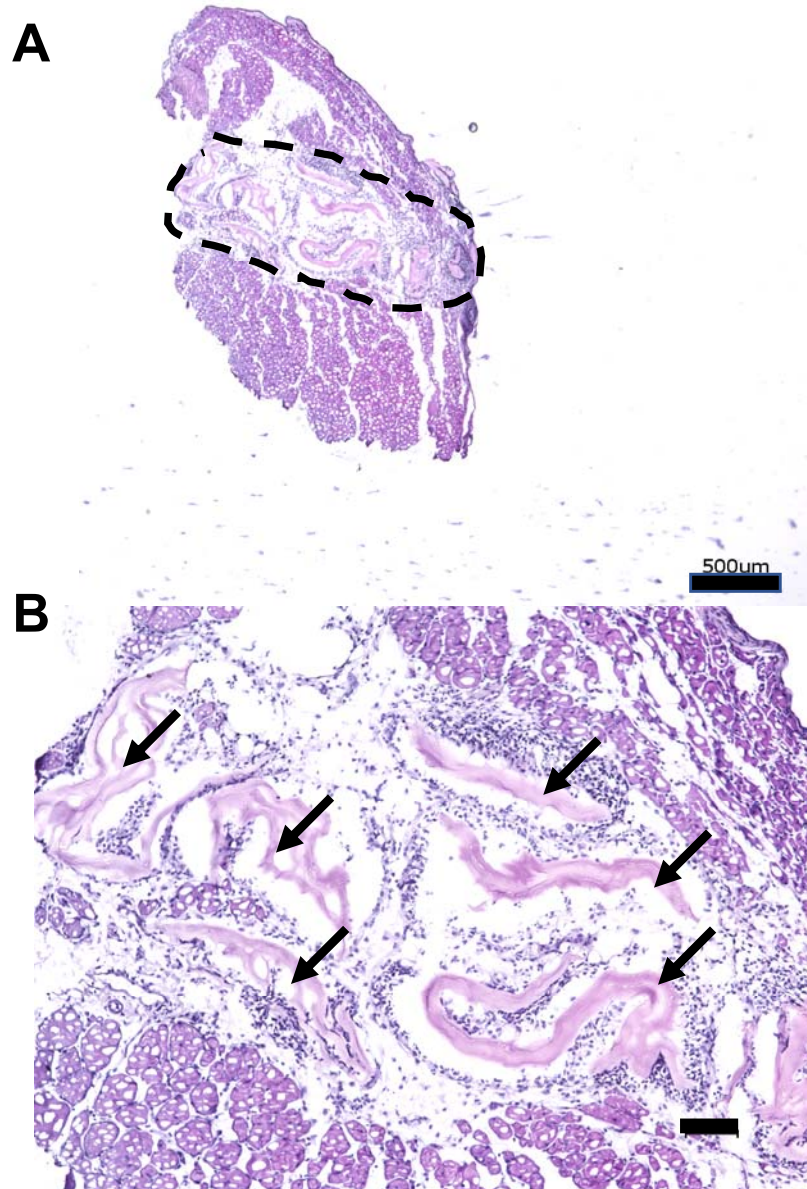

**Figure S2.** Representative histological images of bFGF scaffold implants at 3 weeks after induction of VML. **(A).** Low magnification image (2X objective) of scaffold implant, as shown by the dotted region in the hematoxylin and eosin stain. **(B).** Higher magnification image (10X objective) shows cellular infiltration and partial degradation of the collagen scaffolds, as indicated by the arrows. Scale bars: 500  $\mu\text{m}$  **(A)** and 100  $\mu\text{m}$  **(B)**.
